# Supplementary material
Source: MDPI journal article supplement (https://www.mdpi.com/2410-3888/7/2/92)
Supplement: s1 [file s1]

# Length–Weight Relationships of 52 Species from the South of Sicily (Central Mediterranean Sea)

Fabio Falsone, Michele Luca Geraci, Danilo Scannella, Vita Gancitano, Federico Di Maio, Giacomo Sardo, Federico Quattrocchi and Sergio Vitale

**Table S1.** Comparison of available length–weight relationships from the South of Sicily. Length is reported in mm for crustaceans and in cm for cephalopods, bony and cartilaginous fishes. Weight is reported at 0.1 grams’ accuracies for crustaceans and cephalopods and at grams for bony and cartilaginous fishes. SEX: F-female, M-male, and C-combined; N: the sample size; a: the intercept of the regression curve; b: the regression slope; R<sup>2</sup>: the coefficient of determination, n.a.: not available, T.G.: Type of growth, A– negative allometry, A+ positive allometry and I isometric. Trawl: c - commercial, s – survey. In bold are reported the significantly difference ( $t$ -test  $p_{\text{value}} < 0.05$ ) LWRs compared to the present study. In italic the species for which the literature comparison was not available.

| Specie                          | SEX | N    | Length (min–max) | a             | b             | R <sup>2</sup> | T.G. | Locality               | Trawl    | Source                       |
|---------------------------------|-----|------|------------------|---------------|---------------|----------------|------|------------------------|----------|------------------------------|
| <b>Crustaceans</b>              |     |      |                  |               |               |                |      |                        |          |                              |
| <i>Aristaemomorpha foliacea</i> | F   | 4290 | 15–68            | 0.002         | 2.5663        | 0.99           | A–   | South of Sicily        | s        | Present study                |
|                                 | M   | 3226 | 19–52            | 0.001         | 2.671         | 0.95           | A–   | South of Sicily        | s        | Present study                |
|                                 | F   | n.a. | n.a.             | <b>0.001</b>  | <b>2.66</b>   | n.a.           | n.a. | <b>South of Sicily</b> | <b>c</b> | <b>Gancitano et al. [39]</b> |
|                                 | M   | n.a. | n.a.             | <b>0.002</b>  | <b>2.51</b>   | n.a.           | n.a. | <b>South of Sicily</b> | <b>c</b> | <b>Gancitano et al. [39]</b> |
|                                 | F   | n.a. | n.a.             | 0.0018–0.0021 | 2.51–2.56     | n.a.           | n.a. | South of Sicily        | s        | Ragonese et al. [40]         |
|                                 | M   | n.a. | n.a.             | 0.0012–0.0013 | 2.56–2.65     | n.a.           | n.a. | South of Sicily        | s        | Ragonese et al. [40]         |
|                                 | F   | n.a. | n.a.             | 0.001         | 2.68          | n.a.           | n.a. | Malta Island           | s        | MRRA [41]                    |
|                                 | M   | n.a. | n.a.             | 0.002         | 2.59          | n.a.           | n.a. | Malta Island           | s        | MRRA [41]                    |
|                                 | F   | n.a. | n.a.             | 0.001         | 2.6065        | n.a.           | n.a. | Malta Island           | c        | MRRA [41]                    |
|                                 | M   | n.a. | n.a.             | <b>0.006</b>  | <b>2.2129</b> | n.a.           | n.a. | <b>Malta Island</b>    | <b>c</b> | <b>MRRA [41]</b>             |
| <i>Aristeus antennatus</i>      | F   | 710  | 18–59            | 0.0056        | 2.2591        | 0.98           | A–   | South of Sicily        | s        | Present study                |
|                                 | M   | 85   | 19–35            | 0.0083        | 2.1281        | 0.92           | A–   | South of Sicily        | s        | Present study                |

|                                 |          |             |                 |                      |                  |                  |                        |            |                                 |
|---------------------------------|----------|-------------|-----------------|----------------------|------------------|------------------|------------------------|------------|---------------------------------|
|                                 | F        | n.a.        | n.a.            | 0.008                | 2.17             | n.a. n.a.        | Malta Island           | s          | AA.VV. [42]                     |
|                                 | M        | n.a.        | n.a.            | 0.013                | 2.01             | n.a. n.a.        | Malta Island           | s          | AA.VV. [42]                     |
|                                 | <b>F</b> | <b>n.a.</b> | <b>n.a.</b>     | <b>0.008</b>         | <b>2.35</b>      | <b>n.a. n.a.</b> | <b>South of Sicily</b> | <b>s</b>   | <b>AA.VV. [42]</b>              |
|                                 | <b>M</b> | <b>n.a.</b> | <b>n.a.</b>     | <b>0.004</b>         | <b>2.12</b>      | <b>n.a. n.a.</b> | <b>South of Sicily</b> | <b>s</b>   | <b>AA.VV. [42]</b>              |
| <i>Nephrops norvegicus</i>      | F        | 2313        | 17–49           | 0.0006               | 3.0578           | 0.98 A+          | South of Sicily        | s          | Present study                   |
|                                 | M        | 3271        | 18–68           | 0.0005               | 3.115            | 0.99 A+          | South of Sicily        | s          | Present study                   |
|                                 | <b>F</b> | <b>n.a.</b> | <b>n.a.</b>     | <b>0.0007</b>        | <b>2.99</b>      | <b>n.a. n.a.</b> | <b>South of Sicily</b> | <b>c</b>   | <b>Gancitano et al. [43]</b>    |
|                                 | <b>M</b> | <b>n.a.</b> | <b>n.a.</b>     | <b>0.0004</b>        | <b>3.2</b>       | <b>n.a. n.a.</b> | <b>South of Sicily</b> | <b>c</b>   | <b>Gancitano et al. [43]</b>    |
|                                 | <b>F</b> | <b>n.a.</b> | <b>n.a.</b>     | <b>0.0004</b>        | <b>3.133</b>     | <b>n.a. n.a.</b> | <b>South of Sicily</b> | <b>s</b>   | <b>Ragonese et al. [40]</b>     |
|                                 | <b>M</b> | <b>n.a.</b> | <b>n.a.</b>     | <b>0.0004</b>        | <b>3.158</b>     | <b>n.a. n.a.</b> | <b>South of Sicily</b> | <b>s</b>   | <b>Ragonese et al. [40]</b>     |
| <i>Parapenaeus longirostris</i> | F        | 25674       | 8–43            | 0.0035               | 2.4325           | 0.97 A–          | South of Sicily        | s          | Present study                   |
|                                 | M        | 21454       | 8–35            | 0.0052               | 2.2822           | 0.93 A–          | South of Sicily        | s          | Present study                   |
|                                 | <b>F</b> | <b>n.a.</b> | <b>n.a.</b>     | <b>0.0029</b>        | <b>2.482</b>     | <b>n.a. n.a.</b> | <b>Tunisia</b>         | <b>c</b>   | <b>Ben Meriem et al. [44]</b>   |
|                                 | <b>M</b> | <b>n.a.</b> | <b>n.a.</b>     | <b>0.0035</b>        | <b>2.41</b>      | <b>n.a. n.a.</b> | <b>Tunisia</b>         | <b>c</b>   | <b>Ben Meriem et al. [44]</b>   |
|                                 | <b>F</b> | <b>n.a.</b> | <b>n.a.</b>     | <b>0.0036</b>        | <b>2.44</b>      | <b>n.a. n.a.</b> | <b>South of Sicily</b> | <b>c</b>   | <b>Gancitano et al. [43]</b>    |
|                                 | <b>M</b> | <b>n.a.</b> | <b>n.a.</b>     | <b>0.0023</b>        | <b>2.57</b>      | <b>n.a. n.a.</b> | <b>South of Sicily</b> | <b>c</b>   | <b>Gancitano et al. [43]</b>    |
|                                 | <b>F</b> | <b>n.a.</b> | <b>n.a.</b>     | <b>0.002–0.0031</b>  | <b>2.48–2.55</b> | <b>n.a. n.a.</b> | <b>South of Sicily</b> | <b>s</b>   | <b>Ragonese et al. [40]</b>     |
|                                 | <b>M</b> | <b>n.a.</b> | <b>n.a.</b>     | <b>0.0027–0.0041</b> | <b>2.40–2.50</b> | <b>n.a. n.a.</b> | <b>South of Sicily</b> | <b>s</b>   | <b>Ragonese et al. [40]</b>     |
| <i>Squilla mantis</i>           | C        | 127         | 78–182          | 0.0017               | 2.8296           | 0.91 A–          | South of Sicily        | s          | Present study                   |
|                                 | <b>C</b> | <b>n.a.</b> | <b>n.a.</b>     | <b>0.0001</b>        | <b>2.56</b>      | <b>n.a. n.a.</b> | <b>South of Sicily</b> | <b>c</b>   | <b>Gancitano et al. [43]</b>    |
| <b>Cephalopods</b>              |          |             |                 |                      |                  |                  |                        |            |                                 |
| <i>Eledone cirrhosa</i>         | C        | 307         | 3.5–15.0        | 0.3141               | 2.859            | 0.93 A–          | South of Sicily        | s          | Present study                   |
|                                 | C        | n.a.        | n.a.            | 0.2897               | 2.89             | n.a. n.a.        | South of Sicily        | c          | Gancitano et al. [43]           |
|                                 | <b>C</b> | <b>803</b>  | <b>3.0–16.5</b> | <b>0.3292</b>        | <b>2.6972</b>    | <b>0.9 A–</b>    | <b>Tunisia</b>         | <b>c-s</b> | <b>Rjeibi et al. [45]</b>       |
| <i>Eledone moschata</i>         | C        | 659         | 4.0–13.0        | 0.4677               | 2.6492           | 0.86 A–          | South of Sicily        | s          | Present study                   |
|                                 | C        | n.a.        | n.a.            | 0.62                 | 2.51             | n.a. n.a.        | South of Sicily        | c          | Gancitano et al. [39]           |
| <i>Illex coindetii</i>          | F        | 4652        | 3.5–21.5        | 0.0512               | 2.7595           | 0.97 A–          | South of Sicily        | s          | Present study                   |
|                                 | M        | 4102        | 4.0–19.0        | 0.0286               | 3.0797           | 0.95 A+          | South of Sicily        | s          | Present study                   |
|                                 | <b>F</b> | <b>n.a.</b> | <b>n.a.</b>     | <b>0.085</b>         | <b>2.58</b>      | <b>n.a. n.a.</b> | <b>South of Sicily</b> | <b>c</b>   | <b>Gancitano et al. [43]</b>    |
|                                 | <b>M</b> | <b>n.a.</b> | <b>n.a.</b>     | <b>0.084</b>         | <b>2.65</b>      | <b>n.a. n.a.</b> | <b>South of Sicily</b> | <b>c</b>   | <b>Gancitano et al. [43]</b>    |
|                                 | <b>F</b> | <b>n.a.</b> | <b>n.a.</b>     | <b>0.0430–0.0460</b> | <b>2.79–2.83</b> | <b>n.a. n.a.</b> | <b>South of Sicily</b> | <b>s</b>   | <b>Ragonese and Jereb, [46]</b> |
|                                 | <b>M</b> | <b>n.a.</b> | <b>n.a.</b>     | <b>0.021</b>         | <b>3.19–3.21</b> | <b>n.a. n.a.</b> | <b>South of Sicily</b> | <b>s</b>   | <b>Ragonese and Jereb, [46]</b> |

|                                  |   |            |                  |               |               |             |      |                        |    |                                   |
|----------------------------------|---|------------|------------------|---------------|---------------|-------------|------|------------------------|----|-----------------------------------|
| <i>Loligo. vulgaris</i>          | C | 2625       | 4.0–45.0         | 0.107         | 2.5527        | 0.97        | A–   | South of Sicily        | s  | Present study                     |
|                                  | C | n.a.       | n.a.             | <b>0.3407</b> | <b>2.12</b>   | n.a.        | n.a. | <b>South of Sicily</b> | c  | <b>Gancitano et al. [43]</b>      |
| <i>Octopus vulgaris</i>          | C | 398        | 4.0–19.5         | 0.3996        | 2.9715        | 0.93        | I    | South of Sicily        | s  | Present study                     |
|                                  | C | n.a.       | n.a.             | 0.5083        | 2.86          | n.a.        | n.a. | South of Sicily        | c  | <b>Gancitano et al. [43]</b>      |
|                                  | C | 324        | n.a.             | 0.3992        | 2.9146        | 0.97        | I    | Tunisia                | c* | Jabeur et al. [47]                |
| <i>Sepia officinalis</i>         | F | 150        | 4.0–19.0         | 0.3048        | 2.6484        | 0.99        | A–   | South of Sicily        | s  | Present study                     |
|                                  | M | 134        | 5.0–17.5         | 0.2474        | 2.7219        | 0.98        | A–   | South of Sicily        | s  | Present study                     |
|                                  | F | n.a.       | n.a.             | 0.2556        | 2.72          | n.a.        | n.a. | South of Sicily        | c  | Gancitano et al. [43]             |
|                                  | M | n.a.       | n.a.             | 0.2945        | 2.65          | n.a.        | n.a. | South of Sicily        | c  | Gancitano et al. [43]             |
| <b>Bony fishes</b>               |   |            |                  |               |               |             |      |                        |    |                                   |
| <i>Boop boops</i>                | C | 312        | 10.0–25.5        | 0.0064        | 3.1709        | 0.96        | A+   | South of Sicily        | s  | Present study                     |
|                                  | C | <b>346</b> | <b>12.6–22.6</b> | <b>0.012</b>  | <b>3.032</b>  | <b>0.95</b> | n.a. | <b>Gulf of Gabes</b>   | c* | <b>Ghailen et al. [24]</b>        |
|                                  | C | <b>45</b>  | <b>12.5–21.0</b> | <b>0.0119</b> | <b>2.887</b>  | <b>0.98</b> | A–   | <b>Gulf of Tunis</b>   | c* | <b>Miled-Fathalli et al. [26]</b> |
|                                  | C | <b>243</b> | <b>12.0–26.0</b> | <b>0.007</b>  | <b>3.06</b>   | <b>0.98</b> | n.a. | <b>Gulf of Tunis</b>   | s  | <b>Cherif et al. [48]</b>         |
|                                  | C | 346        | 12.6–22.6        | 0.0102        | 3.034         | 0.95        | n.a. | Gulf of Gabes          | c* | Ghailen et al. [24]               |
| <i>Chelidonichthys lastoviza</i> | C | 682        | 5.5–21.5         | 0.0139        | 2.9326        | 0.97        | A–   | South of Sicily        | s  | Present study                     |
|                                  | C | <b>52</b>  | <b>11.8–22.0</b> | <b>0.0098</b> | <b>3.026</b>  | <b>0.99</b> | I    | <b>Gulf of Tunis</b>   | c* | <b>Miled-Fathalli et al. [26]</b> |
|                                  | C | 1641       | 5.1–22.0         | 0.0111        | 2.9991        | 0.98        | n.a. | South of Sicily        |    | Cannizzaro et al. [49]            |
| <i>Chelidonichthys lucerna</i>   | C | 450        | 5.0–71.0         | 0.0121        | 2.9219        | 0.99        | A–   | South of Sicily        | s  | Present study                     |
|                                  | C | n.a.       | n.a.             | 0.005         | 3.14          | n.a.        | n.a. | South of Sicily        | c  | Gancitano et al. [43]             |
|                                  | C | <b>256</b> | <b>11.7–27.9</b> | <b>0.0077</b> | <b>3.17</b>   | <b>0.98</b> | I    | <b>Tunisia</b>         | s  | <b>Rimel et al. [50]</b>          |
|                                  | C | 735        | 5.1–44.1         | 0.0084        | 3.0263        | 0.99        | n.a. | South of Sicily        | s  | Cannizzaro et al. [49]            |
| <i>Diplodus annularis</i>        | C | 86         | 9.0–18.0         | 0.0384        | 2.728         | 0.97        | A–   | South of Sicily        | s  | Present study                     |
|                                  | C | 78         | 9.4–17.5         | 0.015         | 3.045         | 0.98        | n.a. | Gulf of Tunis          | c* | Miled-Fathalli et al. [26]        |
|                                  | C | <b>161</b> | <b>9.8–16.0</b>  | <b>0.0253</b> | <b>3.012</b>  | <b>0.95</b> | n.a. | <b>Gulf of Gabes</b>   | c* | <b>Ghailen et al. [24]</b>        |
|                                  | C | <b>470</b> | <b>9.6–17.0</b>  | <b>0.012</b>  | <b>2.9</b>    | <b>0.98</b> | n.a. | <b>Gulf of Tunis</b>   | s  | <b>Cherif et al. [48]</b>         |
| <i>Engraulis engraulis</i>       | C | 2313       | 8.5–16.5         | 0.0036        | 3.2233        | 0.87        | A+   | South of Sicily        | s  | Present study                     |
|                                  | C | 160        | 7.4–18.1         | 0.0031        | 3.2709        | 0.96        | n.a. | South of Sicily        | s  | Cannizzaro et al. [49]            |
|                                  | C | n.a.       | n.a.             | <b>0.002</b>  | <b>3.5298</b> | n.a.        | n.a. | <b>South of Sicily</b> | s  | <b>Basilone et al. [51]</b>       |
|                                  | C | n.a.       | n.a.             | <b>0.0014</b> | <b>3.37</b>   | n.a.        | n.a. | <b>South of Sicily</b> | c  | <b>Gancitano et al. [52]</b>      |
| <i>Helicolenus dactylopterus</i> | C | 5069       | 2.0–34.0         | 0.0195        | 2.9479        | 0.99        | A–   | South of Sicily        |    | Present study                     |
|                                  | C | <b>85</b>  | <b>11.5–24.0</b> | <b>0.0198</b> | <b>2.9</b>    | <b>0.97</b> | I    | <b>Gulf of Tunis</b>   | c* | <b>Miled-Fathalli et al. [26]</b> |

|                                 |   |             |                  |               |               |             |             |                        |          |                               |
|---------------------------------|---|-------------|------------------|---------------|---------------|-------------|-------------|------------------------|----------|-------------------------------|
|                                 | C | 513         | 8.0–30.6         | 0.022         | 2.87          | 0.99        | n.a.        | Northern Tunisian      | s        | Mili et al. [53]              |
|                                 | C | n.a.        | 2.0–33.0         | 0.0129        | 3.05          | n.a.        | n.a.        | South of Sicily        | s        | Ragonese et al. [40]          |
|                                 | C | 539         | 4.0–34.4         | 0.0145        | 3.0317        | 0.99        | n.a.        | South of Sicily        | s        | Cannizzaro et al. [49]        |
| <i>Lepidorhombus boscii</i>     | C | 632         | 6.5–38.5         | 0.0058        | 3.1214        | 0.98        | A+          | South of Sicily        | s        | Present study                 |
|                                 | C | 1390        | 5.8–33.8         | 0.0044        | 3.2002        | 0.99        | n.a.        | South of Sicily        | s        | Cannizzaro et al. [49]        |
| <i>Lophius budegassa</i>        | F | 232         | 10.5–78.0        | 0.0191        | 2.9097        | 0.99        | A–          | South of Sicily        | s        | Present study                 |
|                                 | M | 366         | 11.0–60.5        | 0.0241        | 2.8249        | 0.97        | A–          | South of Sicily        | s        | Present study                 |
|                                 | F | n.a.        | n.a.             | 0.018         | 2.95          | n.a.        | n.a.        | South of Sicily        | c        | Gancitano et al. [54]         |
|                                 | M | n.a.        | n.a.             | 0.0135        | 2.99          | n.a.        | n.a.        | South of Sicily        | c        | Gancitano et al. [54]         |
| <i>Lophius piscatorius</i>      | C | 95          | 13.0–113.0       | 0.0219        | 2.8909        | 0.99        | A–          | South of Sicily        | s        | Present study                 |
|                                 | C | 138         | 6.3–64.0         | 0.0273        | 2.8472        | 0.98        | n.a.        | South of Sicily        | s        | Cannizzaro et al. [49]        |
|                                 | C | <b>121</b>  | <b>23.7–67.4</b> | <b>0.034</b>  | <b>2.91</b>   | <b>0.88</b> | <b>I</b>    | <b>Tunisia</b>         | <b>s</b> | <b>Rimel et al. [50]</b>      |
|                                 | C | n.a.        | n.a.             | 0.0146        | 2.99          | n.a.        | n.a.        | South of Sicily        | c        | Gancitano et al. [43]         |
| <i>Merluccius merluccius</i>    | C | 16933       | 10.0–80.5        | 0.0051        | 3.1107        | 0.99        | A+          | South of Sicily        | s        | Present study                 |
|                                 | C | n.a.        | n.a.             | 0.0053        | 3.09          | n.a.        | n.a.        | South of Sicily        | c        | Gancitano et al. [39]         |
|                                 | C | <b>537</b>  | <b>n.a.</b>      | <b>0.007</b>  | <b>3.0302</b> | <b>0.93</b> | <b>n.a.</b> | <b>South of Sicily</b> | <b>s</b> | <b>Cannizzaro et al. [49]</b> |
|                                 | C | <b>n.a.</b> | <b>n.a.</b>      | <b>0.004</b>  | <b>3.13</b>   | <b>n.a.</b> | <b>n.a.</b> | <b>Tunisia</b>         | <b>s</b> | <b>Cherif et al. [48]</b>     |
| <i>Micromesistius poutassou</i> | C | 175         | 10.0–32.5        | 0.0058        | 3.0934        | 0.98        | A+          | South of Sicily        | s        | Present study                 |
|                                 | C | 178         | 10.7–38.5        | 0.0029        | 3.3001        | 0.98        | n.a.        | South of Sicily        | s        | Cannizzaro et al. [49]        |
| <i>Mullus barbatus</i>          | F | 3533        | 6.0–27.5         | 0.0127        | 2.9656        | 0.97        | A–          | South of Sicily        | s        | Present study                 |
|                                 | M | 3661        | 8.5–26.0         | 0.0211        | 2.7612        | 0.94        | A–          | South of Sicily        | s        | Present study                 |
|                                 | F | <b>72</b>   | <b>n.a.</b>      | <b>0.0112</b> | <b>2.9818</b> | <b>0.96</b> | <b>n.a.</b> | <b>South of Sicily</b> | <b>s</b> | <b>Cannizzaro et al. [49]</b> |
|                                 | M | <b>121</b>  | <b>n.a.</b>      | <b>0.007</b>  | <b>3.1495</b> | <b>0.95</b> | <b>A–</b>   | <b>South of Sicily</b> | <b>s</b> | <b>Cannizzaro et al. [49]</b> |
|                                 | F | <b>n.a.</b> | <b>n.a.</b>      | <b>0.0093</b> | <b>3.03</b>   | <b>n.a.</b> | <b>n.a.</b> | <b>South of Sicily</b> | <b>c</b> | <b>CNR-IAMC, [55]</b>         |
|                                 | M | <b>n.a.</b> | <b>n.a.</b>      | <b>0.0131</b> | <b>2.92</b>   | <b>n.a.</b> | <b>n.a.</b> | <b>South of Sicily</b> | <b>c</b> | <b>CNR-IAMC, [55]</b>         |
|                                 | F | <b>773</b>  | <b>9.7–25.1</b>  | <b>0.0068</b> | <b>3.1222</b> | <b>0.94</b> | <b>A+</b>   | <b>Gulf of Tunis</b>   | <b>s</b> | <b>Cherif et al. [48]</b>     |
|                                 | M | <b>263</b>  | <b>10.6–21.2</b> | <b>0.0055</b> | <b>3.2158</b> | <b>0.92</b> | <b>A+</b>   | <b>Gulf of Tunis</b>   | <b>s</b> | <b>Cherif et al. [48]</b>     |
| <i>Mullus surmuletus</i>        | C | 1528        | 10.0–30.0        | 0.0133        | 2.971         | 0.97        | A–          | South of Sicily        | s        | Present study                 |
|                                 | C | n.a.        | n.a.             | 0.0107        | 3.05          | n.a.        | n.a.        | South of Sicily        | c        | Gancitano et al. [43]         |
|                                 | C | 405         | 6.7–32.3         | 0.0093        | 3.0972        | 0.97        |             | South of Sicily        | s        | Cannizzaro et al. [49]        |
| <i>Pagellus acarne</i>          | C | 1250        | 6.0–28.5         | 0.0097        | 3.1093        | 0.98        | A+          | South of Sicily        | s        | Present study                 |
|                                 | C | 312         | 16.5–25.5        | 0.003         | 3.5207        | 0.98        | A+          | off Tunisian coast     | c        | Di Maio et al. [27]           |

|                                |   |             |                  |               |                  |             |             |                        |           |                                   |
|--------------------------------|---|-------------|------------------|---------------|------------------|-------------|-------------|------------------------|-----------|-----------------------------------|
|                                | C | 289         | 11.7–26.9        | 0.0063        | 3.2572           | 0.96        | n.a.        | South of Sicily        | s         | Cannizzaro et al. [49]            |
| <i>Pagellus bogaraveo</i>      | C | 788         | 6.5–33.0         | 0.0103        | 3.0573           | 0.98        | A+          | South of Sicily        | s         | Present study                     |
|                                | C | <b>164</b>  | <b>5.5–23.6</b>  | <b>0.0156</b> | <b>2.9405</b>    | <b>0.97</b> | <b>n.a.</b> | <b>South of Sicily</b> | <b>s</b>  | <b>Cannizzaro et al. [49]</b>     |
| <i>Pagellus erythrinus</i>     | C | 129         | 14.1–23.2        | 0.0109        | 3.03             | 0.9         | n.a.        | Gulf of Gabes          | c*        | Ghailen et al. [24]               |
|                                | C | 847         | 9.0–44.0         | 0.0193        | 2.8794           | 0.98        | A–          | South of Sicily        | s         | Present study                     |
|                                | C | 330         | n.a.             | 0.0148        | 2.9449           | 0.99        | n.a.        | South of Sicily        | s         | Cannizzaro et al. [49]            |
| <i>Phycis blennoides</i>       | F | 1889        | 9.5–52.5         | 0.0048        | 3.1335           | 0.99        | A+          | South of Sicily        | s         | Present study                     |
|                                | M | 1489        | 10.5–44.5        | 0.0044        | 3.1634           | 0.99        | A+          | South of Sicily        | s         | Present study                     |
|                                | F | <b>n.a.</b> | <b>5.0–54.0</b>  | <b>0.0044</b> | <b>2.78–2.85</b> | <b>n.a.</b> | <b>n.a.</b> | <b>South of Sicily</b> | <b>s</b>  | <b>Ragonese et al. [40]</b>       |
|                                | M | <b>n.a.</b> | <b>5.0–54.0</b>  | <b>0.0035</b> | <b>2.81–2.91</b> | <b>n.a.</b> | <b>n.a.</b> | <b>South of Sicily</b> | <b>s</b>  | <b>Ragonese et al. [40]</b>       |
| <i>Sardina pilchardus</i>      | C | 2783        | 8.5–18.0         | 0.0032        | 3.306            | 0.87        | A+          | South of Sicily        | s         | Present study                     |
|                                | C | n.a.        | n.a.             | 0.0077        | 3                | n.a.        | n.a.        | South of Sicily        | c         | Gancitano et al. [53]             |
| <i>Sardinella aurita</i>       | C | 136         | 9.5–17.0         | 0.0065        | 3.0251           | 0.92        | I           | South of Sicily        | s         | Present study                     |
|                                | C | 328         | 7.8–24.0         | 0.0074        | 3.009            | 0.96        | n.a.        | Gulf of Gabes          | c*        | Ghailen et al. [24]               |
| <i>Spicara smaris</i>          | C | 170         | 5.5–19.0         | 0.0159        | 2.7723           | 0.91        | I           | South of Sicily        | s         | Present study                     |
|                                | C | <b>49</b>   | <b>12.5–16.6</b> | <b>0.0305</b> | <b>2.599</b>     | <b>0.92</b> | <b>A–</b>   | <b>Gulf of Tunis</b>   | <b>c*</b> | <b>Miled-Fathalli et al. [26]</b> |
|                                | C | 99          | 8.4–20.1         | 0.0038        | 3.3299           | 0.95        | n.a.        | South of Sicily        | s         | Cannizzaro et al. [49]            |
| <i>Trachurus mediterraneus</i> | F | 649         | 10.5–26.5        | 0.0162        | 2.7467           | 0.95        | A–          | South of Sicily        | s         | Present study                     |
|                                | M | 464         | 11.0–28.0        | 0.0129        | 2.8333           | 0.94        | A–          | South of Sicily        | s         | Present study                     |
|                                | F | n.a.        | n.a.             | 0.0054        | 3.13             | n.a.        | n.a.        | South of Sicily        | c         | Gancitano et al. [43]             |
|                                | M | n.a.        | n.a.             | 0.0052        | 3.14             | n.a.        | n.a.        | South of Sicily        | c         | Gancitano et al. [43]             |
|                                | F | <b>123</b>  | <b>14.0–29.3</b> | <b>0.0086</b> | <b>2.933</b>     | <b>0.93</b> | <b>n.a.</b> | <b>Gulf of Gabes</b>   | <b>c*</b> | <b>Ghailen et al. [24]</b>        |
|                                | M | 89          | 14.2–30.4        | 0.0131        | 2.807            | 0.93        | n.a.        | Gulf of Gabes          | c*        | Ghailen et al. [24]               |
| <i>Trachurus trachurus</i>     | C | 5175        | 8.5–45.0         | 0.0076        | 3.0382           | 0.98        | A+          | South of Sicily        | s         | Present study                     |
|                                | C | n.a.        | n.a.             | 0.0053        | 3.14             | n.a.        | n.a.        | South of Sicily        | c         | Gancitano et al. [43]             |
| <i>Zeus faber</i>              | F | 372         | 9.0–58.0         | 0.0177        | 2.9366           | 0.99        | A–          | South of Sicily        | s         | Present study                     |
|                                | M | 289         | 10.0–49.0        | 0.0232        | 2.8434           | 0.99        | A–          | South of Sicily        | s         | Present study                     |
|                                | C | 163         | 7.2–26.4         | 0.0287        | 2.91             | 0.99        | I           | Tunisia                | s         | Rimel et al. [50]                 |
| <b>Cartilaginous fishes</b>    |   |             |                  |               |                  |             |             |                        |           |                                   |
| <i>Galeus melastomus</i>       | F | 3868        | 9.0–55.0         | 0.0032        | 2.9835           | 0.99        | A–          | South of Sicily        | s         | Present study                     |
|                                | M | 4059        | 9.0–51.0         | 0.0041        | 2.9095           | 0.99        | A–          | South of Sicily        | s         | Present study                     |
|                                | F | 3879        | 7.5–59.5         | 0.0027        | 3.02             | n.a.        | I           | South of Sicily        | s         | Ragonese et al. [56]              |

|                              | M        | 4245        | 9.5–51.5          | 0.0041        | 2.95         | n.a.        | I           | South of Sicily        | s        | Ragonese et al. [56]         |
|------------------------------|----------|-------------|-------------------|---------------|--------------|-------------|-------------|------------------------|----------|------------------------------|
| <i>Mustelus mustelus</i>     | F        | 87          | 29.5–126.0        | 0.0028        | 3.0153       | 0.99        | I           | South of Sicily        | s        | Present study                |
|                              | M        | 121         | 27.5–135.0        | 0.0026        | 3.0291       | 0.99        | I           | South of Sicily        | s        | Present study                |
|                              | F        | 640         | 34.5–165.0        | 0.004         | 2.896        | 0.99        | n.a.        | Gulf of Gabes          | c        | Marouani et al, [57]         |
|                              | <b>M</b> | <b>534</b>  | <b>34.0–144.5</b> | <b>0.007</b>  | <b>3.036</b> | <b>0.99</b> | <b>n.a.</b> | <b>Gulf of Gabes</b>   | <b>c</b> | <b>Marouani et al, [57]</b>  |
| <i>Mustelus punctulatus</i>  | C        | 42          | 45.5–98.0         | 0.0069        | 2.7969       | 0.63        | A–          | South of Sicily        | s        | Present study                |
|                              | F        | 316         | 25.0–122.0        | 0.0011        | 3.2557       | n.a.        | n.a.        | Gulf of Gabes          | c*       | Saidi et al. [58]            |
|                              | M        | 349         | 24.5–111.0        | 0.004         | 2.9325       | n.a.        | n.a.        | Gulf of Gabes          | c*       | Saidi et al. [589]           |
| <i>Scyliorhinus canicula</i> | F        | 1537        | 10.5–48.0         | 0.0014        | 3.2472       | 0.99        | A+          | South of Sicily        | s        | Present study                |
|                              | M        | 1774        | 10.0–51.5         | 0.0019        | 3.1375       | 0.99        | A+          | South of Sicily        | s        | Present study                |
|                              | <b>F</b> | <b>n.a.</b> | <b>n.a.</b>       | <b>0.0028</b> | <b>3.07</b>  | <b>n.a.</b> | <b>n.a.</b> | <b>South of Sicily</b> | <b>c</b> | <b>Gancitano et al. [43]</b> |
|                              | <b>M</b> | <b>n.a.</b> | <b>n.a.</b>       | <b>0.0054</b> | <b>2.87</b>  | <b>n.a.</b> | <b>n.a.</b> | <b>South of Sicily</b> | <b>c</b> | <b>Gancitano et al. [43]</b> |
| <i>Squalus blainville</i>    | F        | 1282        | 17.5–75.0         | 0.0034        | 3.0816       | 0.99        | A+          | South of Sicily        | s        | Present study                |
|                              | M        | 970         | 16.5–77.0         | 0.0048        | 2.9834       | 0.99        | A–          | South of Sicily        | s        | Present study                |
|                              | C        | 85          | 25.0–68.0         | 0.007         | 3.25         | 0.83        | n.a.        | South of Sicily        | c-s      | Malagola, [59]               |

\* studies which combine data from trawling and passive gears. § [http://tesi.cab.unipd.it/53621/1/Malagola\\_Silvia.pdf](http://tesi.cab.unipd.it/53621/1/Malagola_Silvia.pdf).
